# Supplementary material for: An aptamer-targeting photoresponsive drug delivery system using “off–on” graphene oxide wrapped mesoporous silica nanoparticles
Source: Royal Society of Chemistry journal article supplement (doi:10.1039/c4nr07493a), 2015-01-01
Supplement: c4nr07493a1.pdf [file c4nr07493a1.pdf]

Supporting Information

**Aptamer-Targeting Photoresponsive Drug Delivery System Using “Off-On” Graphene Oxide Wrapped Mesoporous Silica Nanoparticles**

**Yuxia Tang,<sup>ab</sup> Hao Hu,<sup>b</sup> Molly Gu Zhang,<sup>b</sup> Jibin Song,<sup>b</sup> Liming Nie,<sup>c</sup> Shouju Wang,<sup>a</sup> Gang Niu,<sup>b</sup> Peng Huang,<sup>\*b</sup> Guangming Lu,<sup>\*a</sup> and Xiaoyuan Chen<sup>\*b</sup>**

*<sup>a</sup> Department of Medical Imaging, Jinling Hospital, School of Medicine, Nanjing University, Nanjing 210002, P.R. China*

*<sup>b</sup> Laboratory of Molecular Imaging and Nanomedicine (LOMIN), National Institute of Biomedical Imaging and Bioengineering (NIBIB), National Institutes of Health, Bethesda, Maryland 20892, United States*

*<sup>c</sup>State Key Laboratory of Molecular Vaccinology and Molecular Diagnostics, Center for Molecular Imaging and Translational Medicine, School of Public Health, Xiamen University, Xiamen, P.R. China*

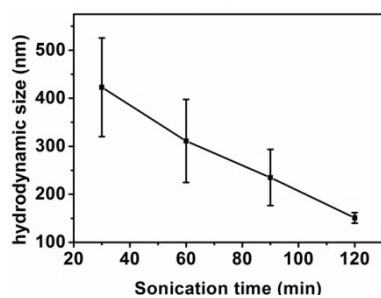

**Figure S1.** Size change of GO with different sonication time.

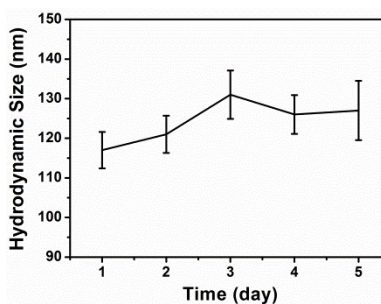

**Figure S2.** Hydrodynamic size of MSN-Dox@GO with different aging time.

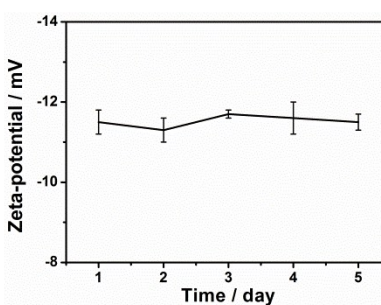

**Figure S3.** Zeta potential of MSN-Dox@GO with different aging time.

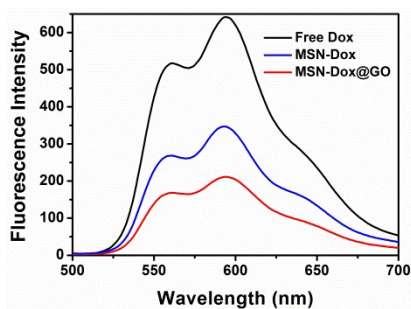

**Figure S4.** Fluorescence emission spectra of Free Dox, MSN-Dox and MSN-Dox@GO.

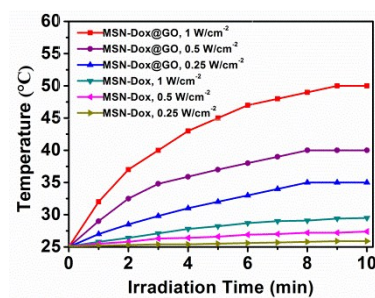

**Figure S5.** The photothermal effects of MSN-Dox@GO and MSN-Dox with different doses of NIR laser irradiation.

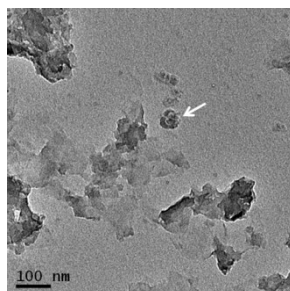

**Figure S6.** TEM image of MSN-Dox@GO after laser irradiation. The white arrow indicates MSN.

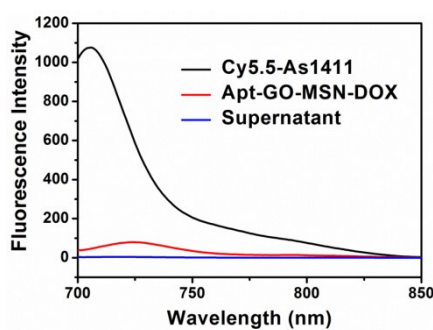

**Figure S7.** Fluorescence emission spectra of Cy5.5-AS1411, supernatant, and MSN-Dox@GO-Apt.

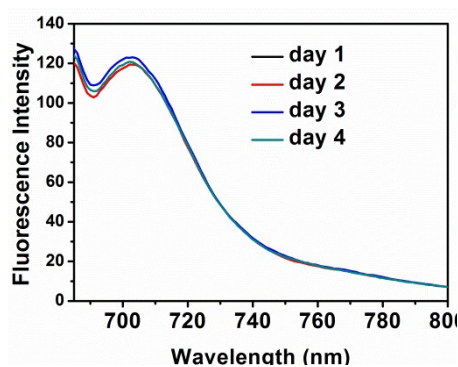

**Figure S8.** Fluorescence emission spectra of MSN-Dox@GO-Apt with different aging time.

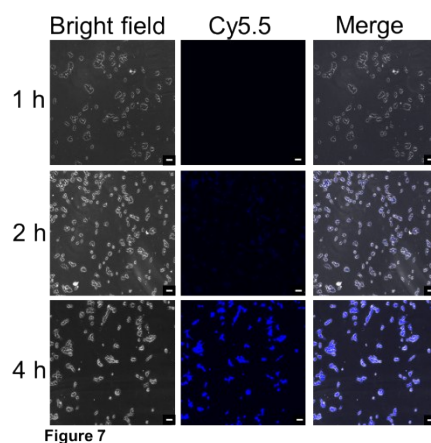

**Figure S9** Fluorescence images of MCF-7 cells incubated with MSN-Dox@GO-Apt at different time points, blue color: Cy5.5-Apt. Scale bar is 20  $\mu\text{m}$ .

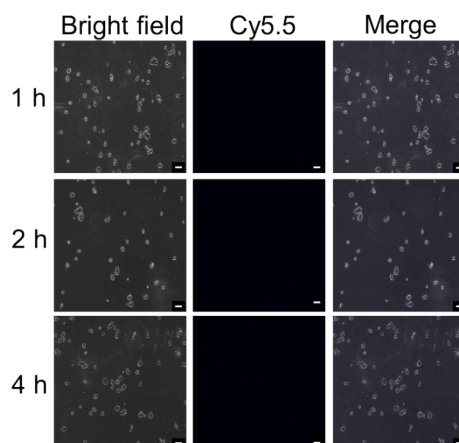

**Figure S10** Fluorescence images of 293T cells incubated with MSN-Dox@GO-Apt at different time points.

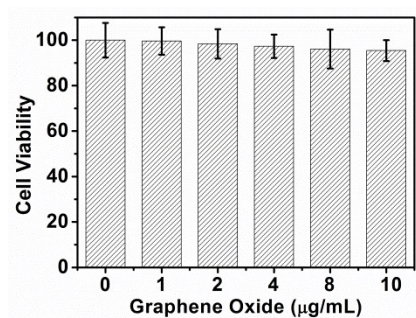

**Figure S11.** Cell cytotoxicity of GO on human breast cancer MCF-7 cells.
